# Supplementary material for: Toward Structure Prediction for Short Peptides Using the Improved SAAP Force Field Parameters
Source: Hindawi journal article supplement (doi:10.1155/2013/407862), 2013-01-01
Supplement: f1 [file 407862.f1.pdf]

# Toward Structure Prediction for Short Peptides Using the Improved SAAP Force Field Parameters<sup>†</sup>

Kenichi Dedachi,<sup>‡</sup> Taku Shimosato,<sup>‡</sup> Toshiya Minezaki,<sup>§</sup> and Michio Iwaoka<sup>‡</sup>

<sup>‡</sup>Department of Chemistry, School of Science, Tokai University, Kitakaname, Hiratsuka-shi,  
Kanagawa 259-1292, Japan

<sup>§</sup>Laboratory of General Education for Science and Technology, School of Science, Tokai University,  
Kitakaname, Hiratsuka-shi, Kanagawa 259-1292, Japan

## Contents:

### Details of the SAAP force field and the simulation algorithm.

**Figure S1.** Traces of the energies obtained for Met-enkephalin by the SAAP-MC (trajectory 1) (a) and AMBER-MD (trajectory 1) (b) simulations at 300 K in water.

**Figure S2.** Representative structures of Met-enkephalin obtained by the AMBER-MD simulation (trajectory 1) at 300 K in water.

**Figure S3-1.** Traces of the main-chain RMSD obtained for chignolin by the SAAP-MC (trajectories 1–10) simulations at 300 K in water.

**Figure S3-2.** Traces of the main-chain RMSD obtained for chignolin by the SAAP-MC (trajectories 11–20) simulations at 300 K in water.

**Figure S4.** The minor structures of chignolin with a representative form obtained by the SAAP-MC simulation at 300 K in water.

**Figure S5.** Representative structures of chignolin obtained by the AMBER-MD simulation at 300 K in water.

**Table S1.** Dihedral angles (degree) of each amino acid residue for representative structures A, A', B, and C of chignolin obtained by the SAAP-MC simulation at 300 K in water.

**Table S2.** The structures of chignolin with the smallest all-atom RMSD from the native structure obtained by the SAAP-MC simulation at 300 K in water.

**Table S3.** The structure of chignolin with the lowest total potential energy obtained by the SAAP-MC simulation at 300 K in water.

**Table S4.** Results of single-point *ab initio* calculation for representative structure A of chignolin in water.

**Table S5.** Results of single-point *ab initio* calculation for representative structure A' of chignolin in water.

**Table S6.** Results of single-point *ab initio* calculation for representative structure B of chignolin in water.

**Table S7.** Results of single-point *ab initio* calculation for representative structure C of chignolin in water.

## Details of the SAAP force field and the simulation algorithm.

The details are described in the references [S1][S2]. In the SAAP force field, the potential energy functions of a polypeptide molecule are given by eq. (1).

$$E^{\text{total}} = E^{\text{SAAP}} + E^{\text{inter}} + E^{\text{others}} \approx E^{\text{SAAP}} + E^{\text{inter}} \quad (1)$$

The total potential energy ( $E^{\text{total}}$ ) is divided into single amino acid potentials of the individual amino acid units ( $E^{\text{SAAP}}$ ) and the inter-amino acid interactions ( $E^{\text{inter}}$ ). The correlation term between these terms ( $E^{\text{others}}$ ) should be included to attain the exact potential energy function, but the  $E^{\text{others}}$  term is currently ignored as a constant because the contribution to the total potential energy would be small compared to the other two terms. The inter-amino acid interaction term ( $E^{\text{inter}}$ ) is further divided into  $E^{\text{ES}}$  and  $E^{\text{LJ}}$  terms [eq. (2)], which correspond to electrostatic interactions and Lennard-Jones potentials (or van der Waals interactions), respectively, between the amino acid units. It should be noted that the  $E^{\text{ES}}$  and  $E^{\text{LJ}}$  terms do not include the atomic interactions within the amino acid units.

$$E^{\text{inter}} = E^{\text{ES}} + E^{\text{LJ}} \quad (2)$$

Important features of the SAAP force field are two-fold. First, the structure of a polypeptide molecule is simply divided into the amino acid units. This is in distinct difference from previous all-atom force fields, where the molecule is divided into the individual atoms. Second, solvent effects are implicitly included in the SAAP force field parameters. The SAAP force field equips with different parameter sets in vacuo ( $D = 1.0$ ), in ether ( $D = 4.335$ ), and in water ( $D = 78.96$ ) for the  $E^{\text{SAAP}}$  term, hence by using the SAAP force field the molecular simulation in water can be carried out within the same computation time to that in vacuo.

To develop the SAAP force field parameters, numerous ab initio calculations have to be performed for each amino acid unit ( $\text{CHO-NH-CHR-CO-NH}_2$ ) in vacuo, in ether, and in water. In order to cover the whole conformational space, each dihedral angle,  $\phi$ ,  $\psi$ ,  $\chi_1$ ,  $\chi_2$ , etc., is divided with a resolution of 15 degree. For example, 13824 ( $= 24^3$ ) structures are considered for valine, which has a three-dimensional conformation freedom (i.e.,  $\phi$ ,  $\psi$  and  $\chi_1$ ). For the each structure, the SAAP force field parameters are defined with the relative energy in the conformational space, the Cartesian coordinates, the atomic charges, and the Lennard-Jones parameters. For the amino acids, except for Gly, Ala, Val and Pro, the side-chain separation approximation is applied in order to reduce the number of the structures to be considered. Although this approximation should cause a decrease in

the accuracy of the SAAP force field, it will take too long time to develop the parameters without the approximation.

In the SAAP simulation program, connection of the amino acid units (CHO-NH-CHR-CO-NH<sub>2</sub>) is achieved as follows. A new amino acid unit is connected to the C-terminal of a pre-peptide so that the amide planes from the both sides are superimposed. Then, the potential energy of the new peptide is calculated as the sum of the potential energy of the pre-peptide, the SAAP energy of the connected amino acid unit ( $E^{\text{SAAP}}$ ), and the electrostatic and Lennard-Jones potentials ( $E^{\text{ES}}$  and  $E^{\text{LJ}}$ , respectively) between the pre-peptide and the connected amino acid unit.

In each Monte Carlo step, one dihedral angle is selected randomly, and the value is changed at random within a given range of the angle (usually  $\pm 32$  degree). When a Pro residue is present in the sequence, the “down” or “up” puckering conformer is randomly selected in each step. A new peptide structure is subsequently built up by using the new set of the dihedral angles, and the potential energy is calculated as described above. If the energy change ( $\Delta E$ ) meets the criterion defined by the Metropolis equation ( $\xi \leq \exp(-\beta \Delta E)$ ;  $\xi$  = a randomly created number between 0 and 1,  $\beta = 1/RT$ ,  $R$  = a gas constant,  $T$  = absolute temperature), the new structure is selected, otherwise it is abandoned.

## References

- [S1] M. Iwaoka, S. Tomoda, “The SAAP force field. A simple approach to a new all-atom protein force field by using single amino acid potential (SAAP) functions in various solvents,” *J. Comput. Chem.*, vol. 24, no. 10, pp. 1192-1200, 2003.
- [S2] M. Iwaoka, N. Kimura, D. Yosida, T. Minezaki, “The SAAP force field. Development of the single amino acid potentials for twenty proteinogenic amino acids and Monte Carlo molecular simulation for short peptides,” *J. Comput. Chem.*, vol. 30, no. 13, pp. 2039-2055, 2009.

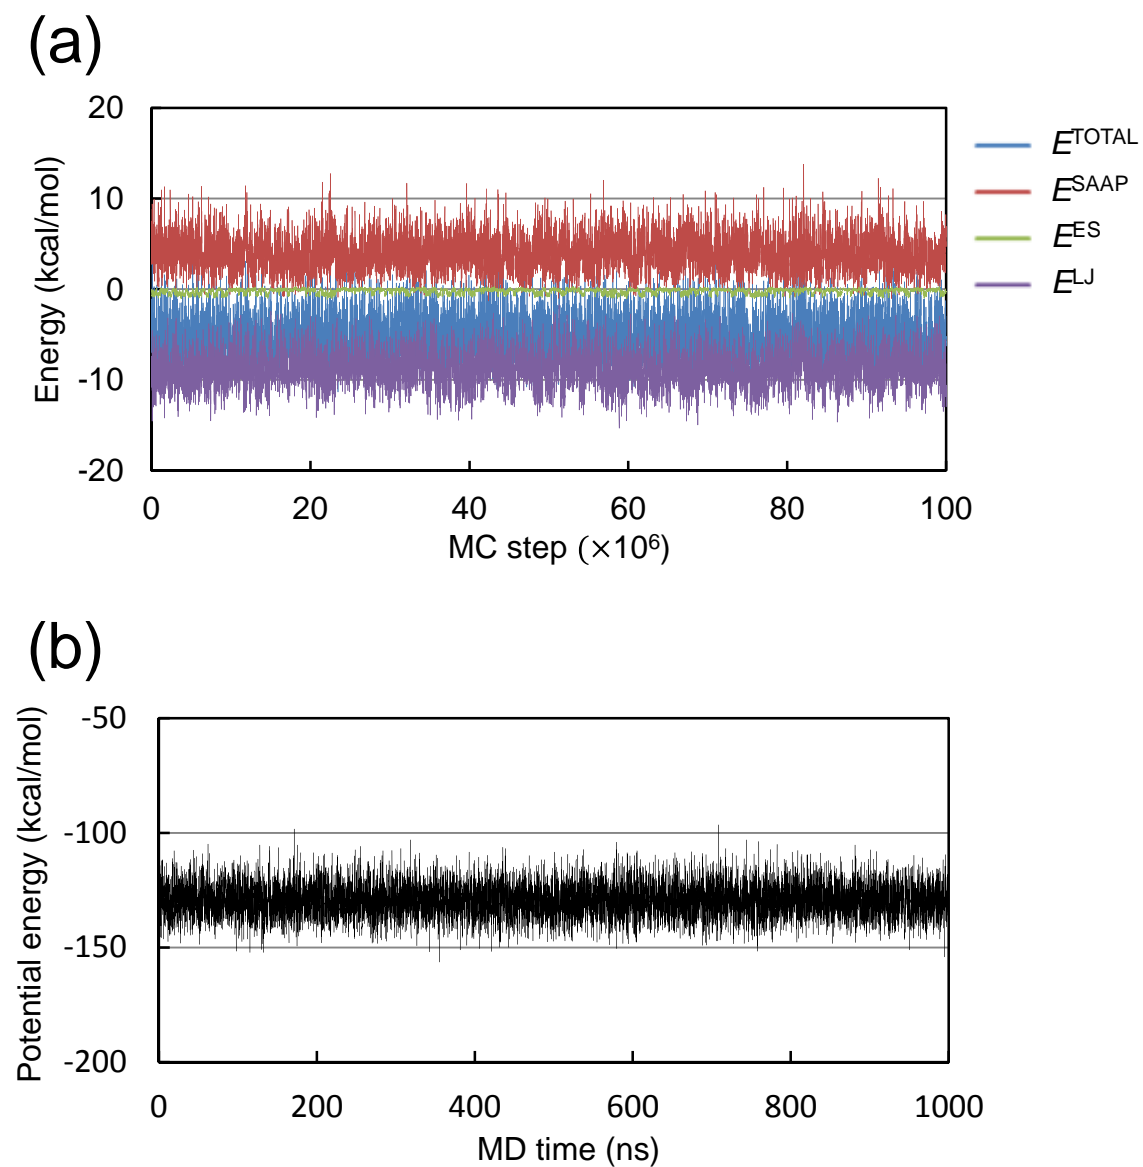

**Figure S1.** Traces of the energies obtained for Met-enkephalin by the SAAP-MC (trajectory 1) (a) and AMBER-MD (trajectory 1) (b) simulations at 300 K in water. The total energy ( $E^{\text{TOTAL}}$ ) obtained by SAAP-MC are divided to  $E^{\text{SAAP}}$ ,  $E^{\text{ES}}$ , and  $E^{\text{LJ}}$  terms.

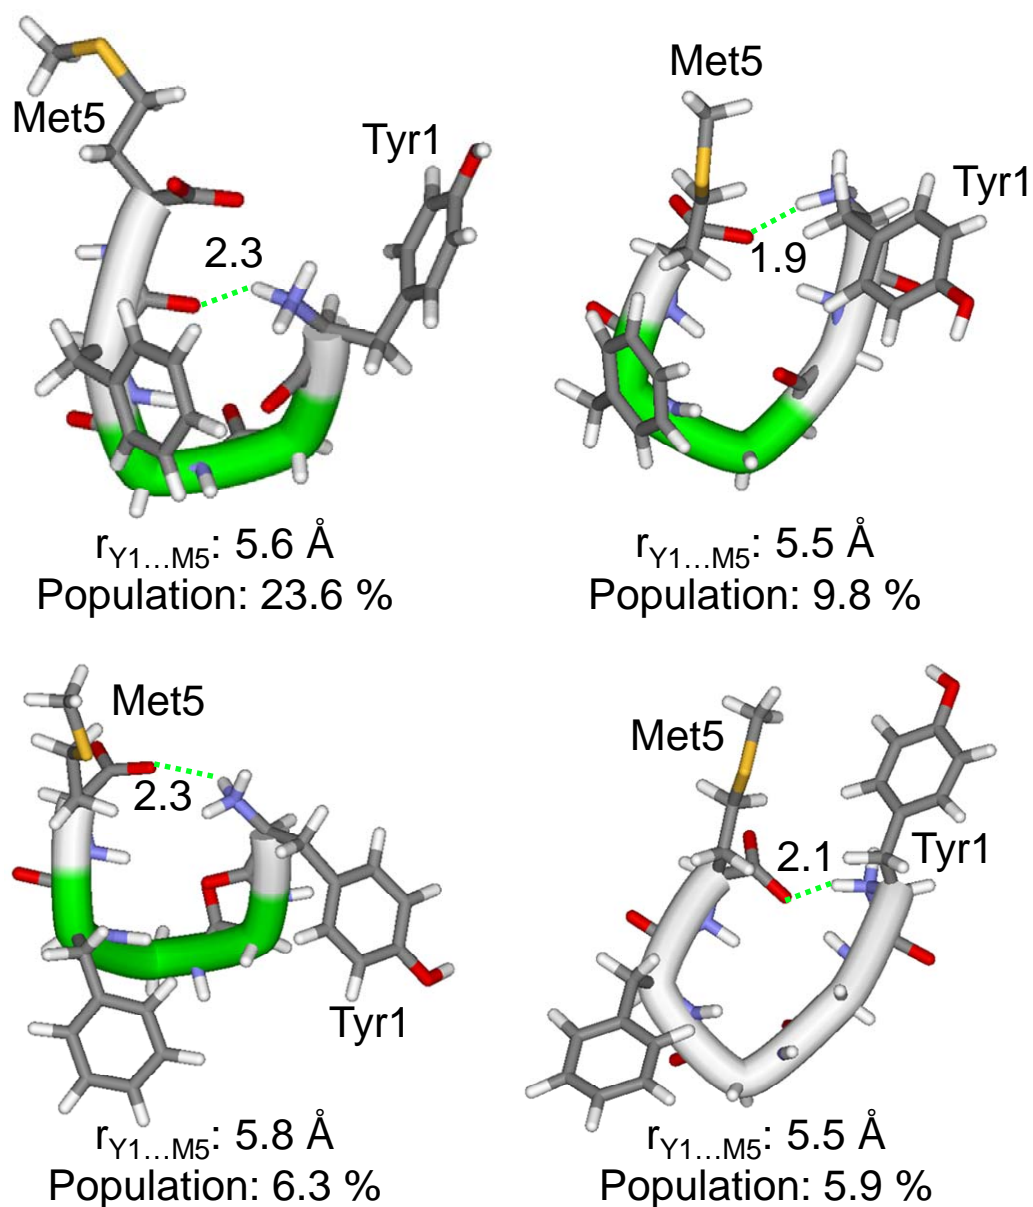

**Figure S2.** Representative structures of Met-enkephalin obtained by the AMBER-MD simulation (trajectory 1) at 300 K in water. The obtained 10,000 structures were analyzed by a structural clustering algorithm using the k-means method based on the main-chain RMSD. Distances of the hydrogen bonds are given in a unit of Å.

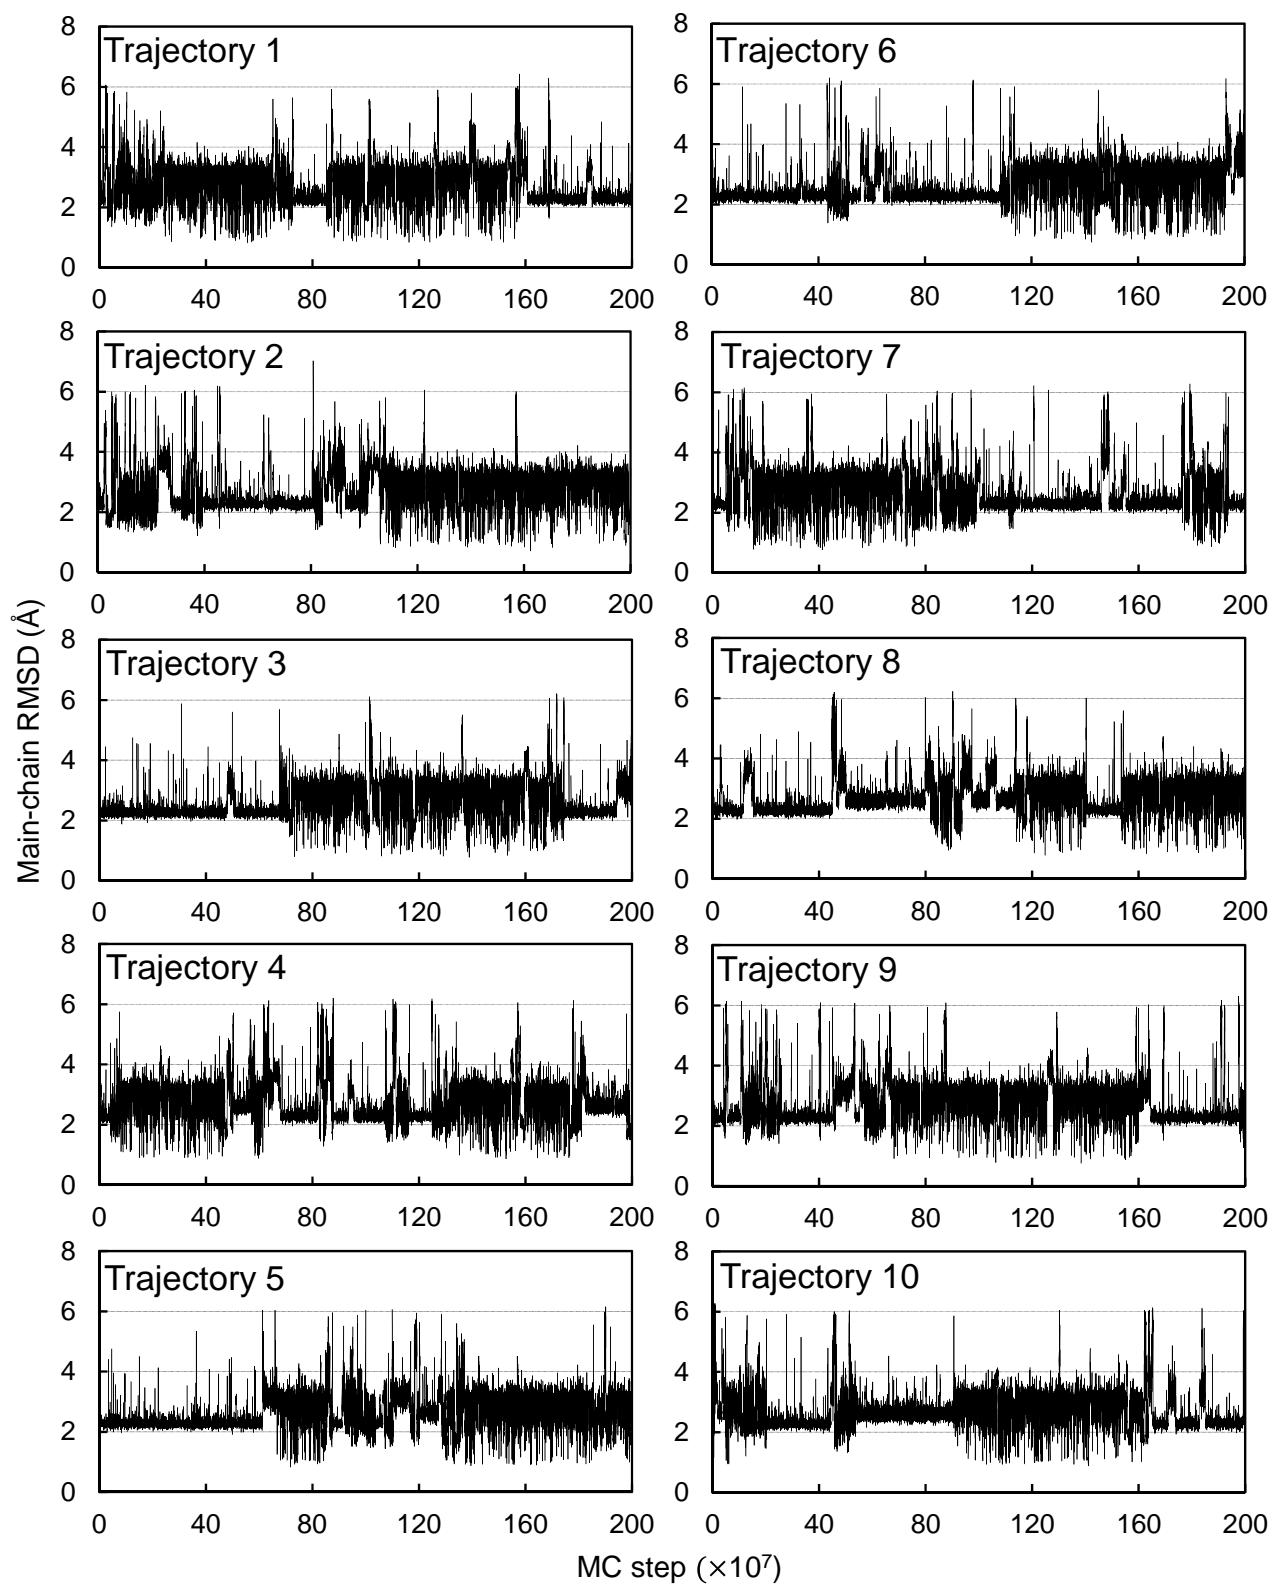

**Figure S3-1.** Traces of the main-chain RMSD obtained for chignolin by the SAAP-MC (trajectories 1–10) simulations at 300 K in water. The RMSD values were calculated with respect to the native structure.

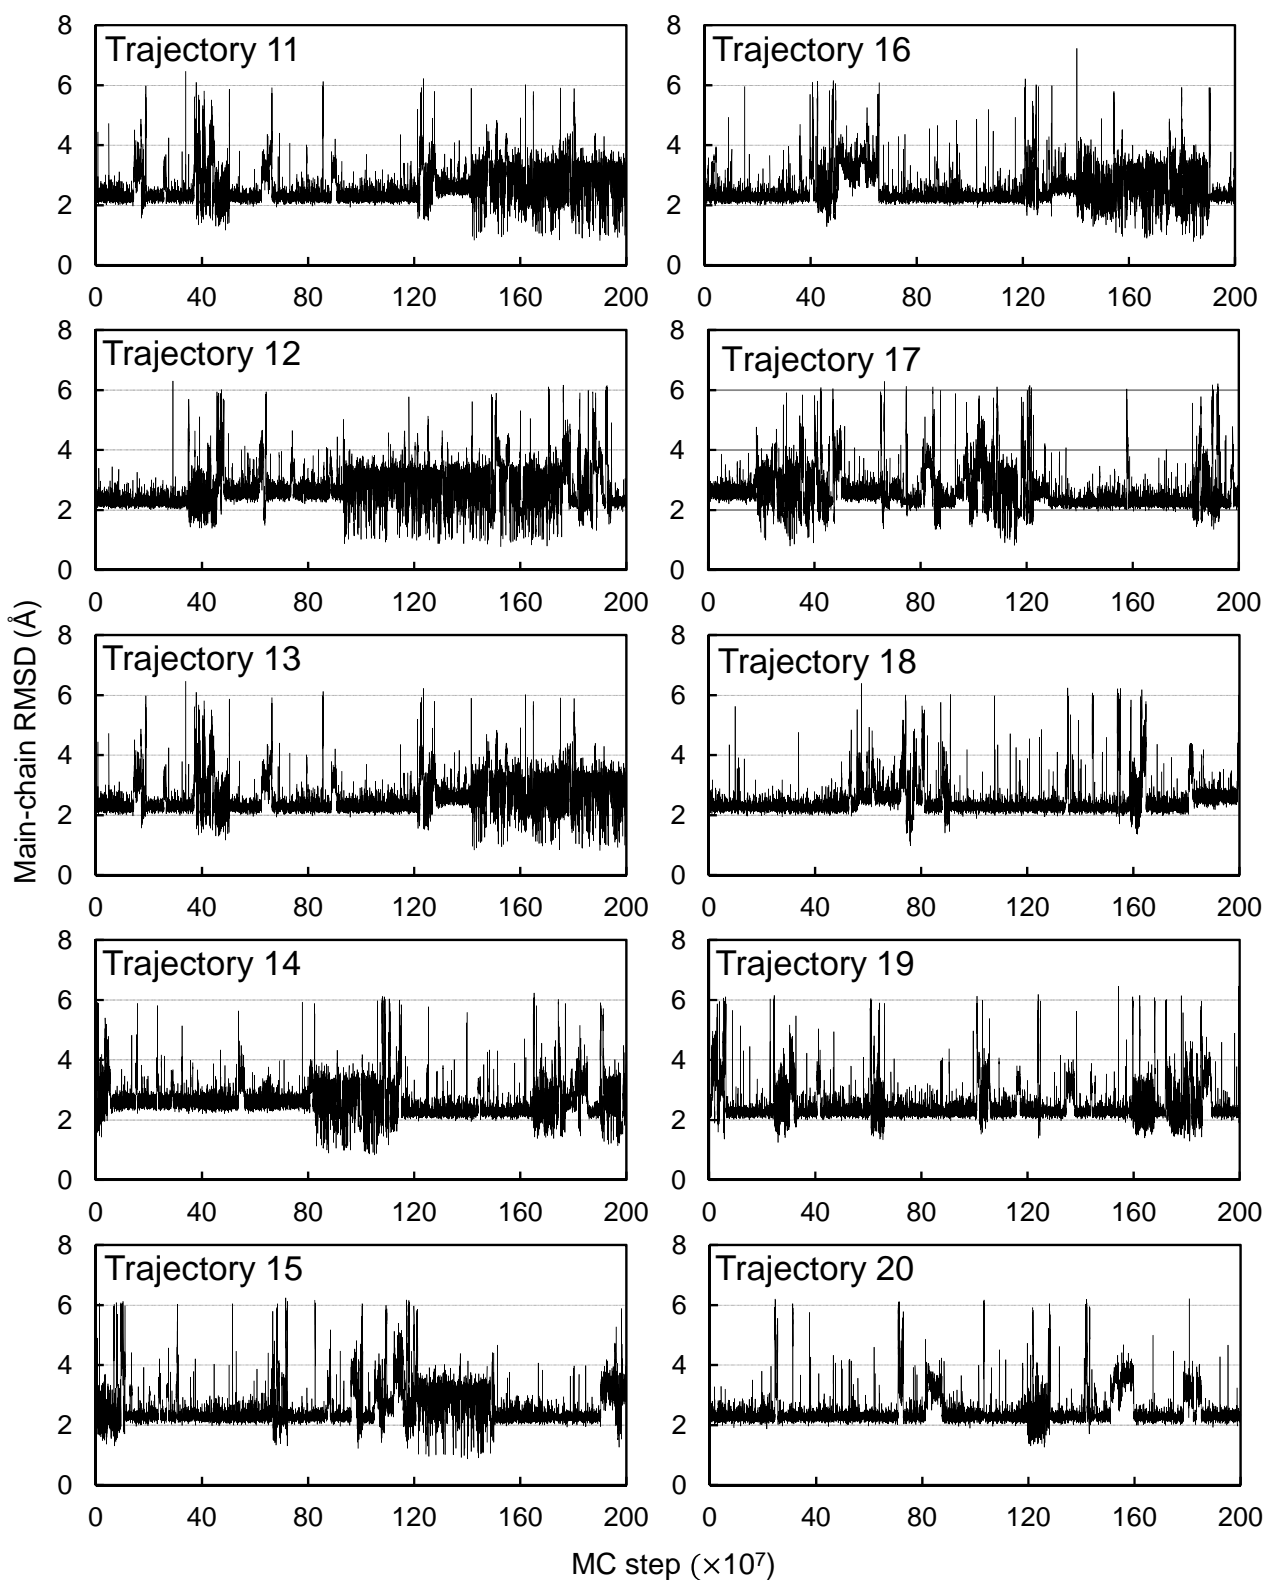

**Figure S3-2.** Traces of the main-chain RMSD obtained for chignolin by the SAAP-MC (trajectories 11–20) simulations at 300 K in water. The RMSD values were calculated with respect to the native structure.



## Type-I $\beta$ -turn

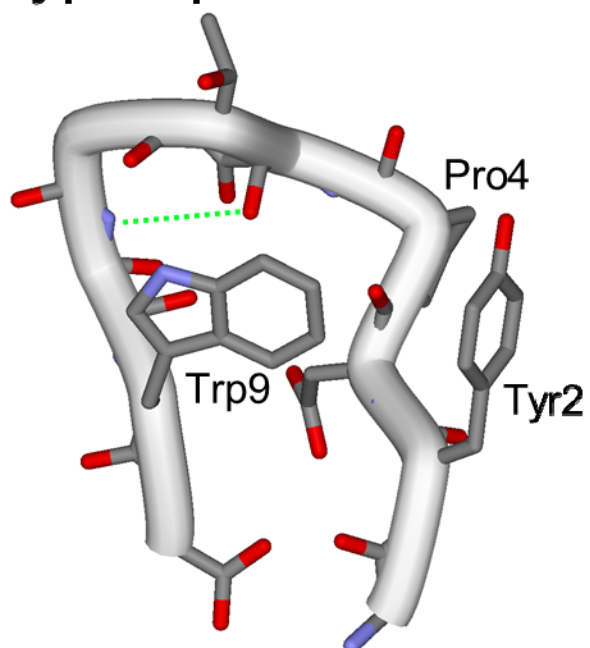

Trajectory 20  
Existence ratio: 33.1 %

## Others

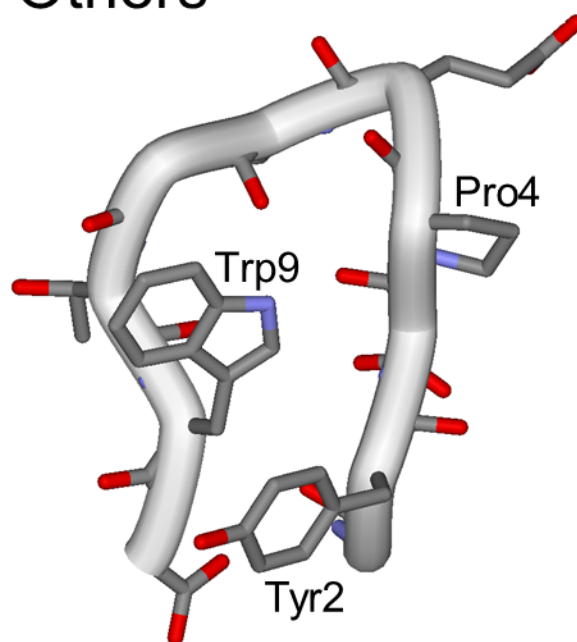

Trajectory 9  
Existence ratio: 14.1 %

## Helical

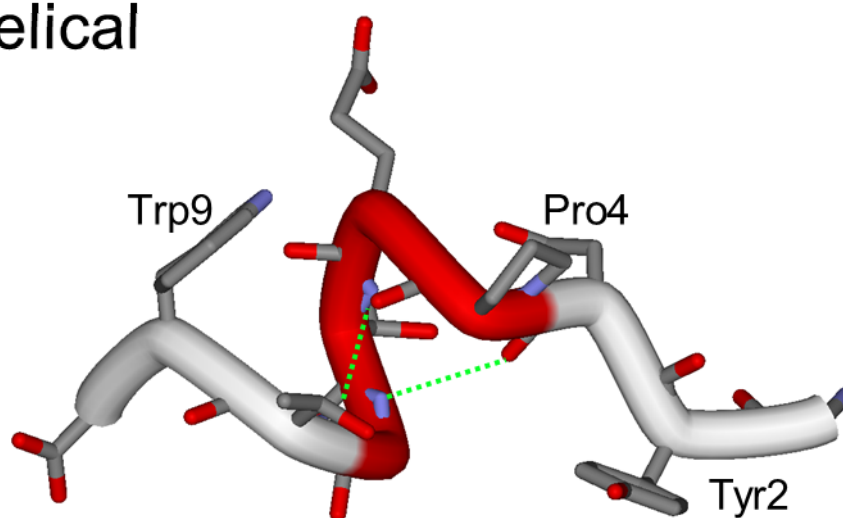

Trajectory 3  
Existence ratio: 2.0 %

**Figure S4.** The minor structures of chignolin with a representative form obtained by the SAAP-MC simulation at 300 K in water. The hydrogen bonds are indicated by dotted lines.

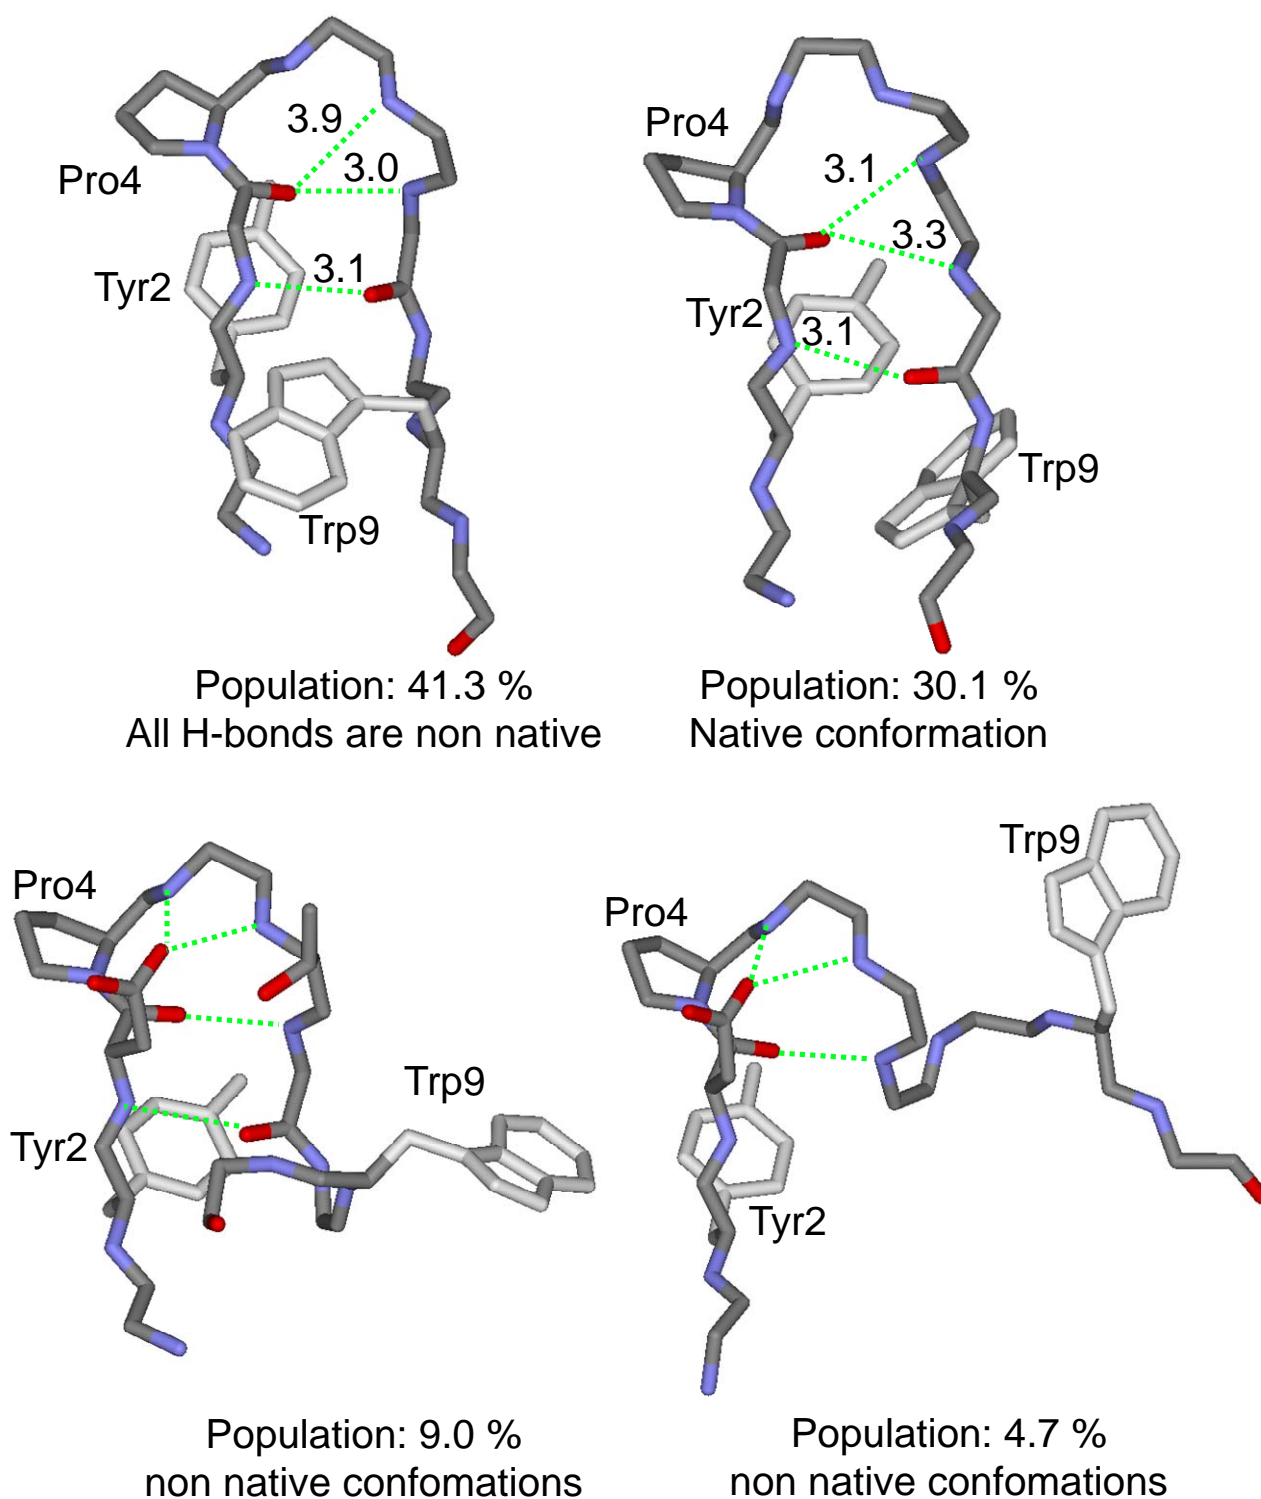

**Figure S5.** Representative structures of chignolin obtained by the AMBER-MD simulation at 300 K in water. The obtained 10,000 structures were analyzed by a structural clustering algorithm using the k-means method based on the main-chain RMSD values. The hydrogen bonds are indicated by dotted lines.

**Table S1.** Dihedral angles (degree) of each amino acid residue for representative structures A, A', B, and C of chignolin obtained by the SAAP-MC simulation at 300 K in water.

## Structure A

|       | $\varphi$ | $\psi$ | $\chi_1$ | $\chi_2$ | $\chi_3$ |
|-------|-----------|--------|----------|----------|----------|
| Gly1  | —         | -177.9 | —        | —        | —        |
| Tyr2  | -103.3    | 116.7  | -68.2    | -87.3    | -180.0   |
| Asp3  | -138.5    | 140.0  | -99.3    | 76.7     | —        |
| Pro4  | -73.1     | -23.1  | —        | —        | —        |
| Glu5  | -80.8     | -25.5  | 28.3     | 178.7    | 128.6    |
| Thr6  | -82.9     | -25.7  | -56.3    | -180.0   | —        |
| Gly7  | 97.0      | 18.5   | —        | —        | —        |
| Thr8  | -114.4    | 139.2  | 82.2     | -180.0   | —        |
| Trp9  | -135.9    | 136.5  | -53.1    | -97.1    | —        |
| Gly10 | 165.6     | -165.4 | —        | —        | —        |

## Structure A'

|       | $\varphi$ | $\psi$ | $\chi_1$ | $\chi_2$ | $\chi_3$ |
|-------|-----------|--------|----------|----------|----------|
| Gly1  | —         | -169.1 | —        | —        | —        |
| Tyr2  | -104.1    | 147.0  | 147.4    | 68.8     | -180.0   |
| Asp3  | -129.1    | 141.3  | -70.8    | 95.6     | —        |
| Pro4  | -78.5     | -24.9  | —        | —        | —        |
| Glu5  | -92.3     | -30.9  | 82.2     | -177.7   | 80.8     |
| Thr6  | -79.6     | -22.7  | -51.2    | -180.0   | —        |
| Gly7  | 51.5      | 40.3   | —        | —        | —        |
| Thr8  | -120.4    | 125.7  | -67.3    | -180.0   | —        |
| Trp9  | -99.3     | 148.1  | -61.9    | -111.8   | —        |
| Gly10 | 166.6     | -150.8 | —        | —        | —        |

## Structure B

|       | $\varphi$ | $\psi$ | $\chi_1$ | $\chi_2$ | $\chi_3$ |
|-------|-----------|--------|----------|----------|----------|
| Gly1  | —         | 157.0  | —        | —        | —        |
| Tyr2  | -112.7    | 141.0  | 163.6    | 94.9     | -180.0   |
| Asp3  | -117.9    | 138.6  | -79.9    | 101.4    | —        |
| Pro4  | -62.2     | -18.5  | —        | —        | —        |
| Glu5  | -77.1     | 133.3  | 113.8    | 162.9    | 29.8     |
| Thr6  | -80.9     | 113.8  | -63.2    | -180.0   | —        |
| Gly7  | 131.7     | -24.9  | —        | —        | —        |
| Thr8  | -133.6    | 118.6  | -61.4    | -180.0   | —        |
| Trp9  | -128.0    | 148.8  | -69.8    | -85.4    | —        |
| Gly10 | 168.5     | -163.5 | —        | —        | —        |

## Structure C

|       | $\varphi$ | $\psi$ | $\chi_1$ | $\chi_2$ | $\chi_3$ |
|-------|-----------|--------|----------|----------|----------|
| Gly1  | —         | -177.1 | —        | —        | —        |
| Tyr2  | -109.8    | 143.9  | 170.7    | -97.1    | -180.0   |
| Asp3  | -115.0    | 149.3  | -76.4    | -89.5    | —        |
| Pro4  | -65.4     | -25.7  | —        | —        | —        |
| Glu5  | -87.8     | 144.8  | -118.7   | -176.7   | 51.1     |
| Thr6  | -82.4     | 131.8  | -72.6    | -180.0   | —        |
| Gly7  | 106.2     | -6.1   | —        | —        | —        |
| Thr8  | -102.1    | -27.3  | 43.8     | -180.0   | —        |
| Trp9  | -91.5     | -21.3  | 59.3     | -99.4    | —        |
| Gly10 | 141.0     | 14.2   | —        | —        | —        |

**Table S2.** The structures of chignolin with the smallest all-atom RMSD from the native structure obtained by the SAAP-MC simulation at 300 K in water.

$E^{\text{TOTAL}}$ : -21.43 kcal/mol.

|       | $\varphi$ | $\psi$ | $\chi_1$ | $\chi_2$ | $\chi_3$ |
|-------|-----------|--------|----------|----------|----------|
| Gly1  | —         | 169.1  | —        | —        | —        |
| Tyr2  | -102.2    | 118.8  | 165.0    | 103.0    | -15.3    |
| Asp3  | -99.6     | 129.6  | -135.0   | -100.1   | —        |
| Pro4  | -83.5     | -27.9  | —        | —        | —        |
| Glu5  | -66.1     | -28.3  | 76.9     | -176.2   | -101.6   |
| Thr6  | -95.6     | -28.9  | -164.7   | 52.6     | —        |
| Gly7  | 74.5      | 10.1   | —        | —        | —        |
| Thr8  | -130.5    | 161.3  | -169.4   | 59.6     | —        |
| Trp9  | -54.8     | 134.9  | -46.3    | 93.9     | —        |
| Gly10 | 153.1     | 6.0    | —        | —        | —        |

**Table S3.** The structure of chignolin with the lowest total potential energy obtained by the SAAP-MC simulation at 300 K in water.

$E^{\text{TOTAL}}$ : -33.36 kcal/mol.

|       | $\varphi$ | $\psi$ | $\chi_1$ | $\chi_2$ | $\chi_3$ |
|-------|-----------|--------|----------|----------|----------|
| Gly1  | —         | -154.8 | —        | —        | —        |
| Tyr2  | -119.7    | 138.8  | 173.6    | 84.5     | 173.6    |
| Asp3  | -114.6    | 150.8  | -94.1    | -64.0    | —        |
| Pro4  | -75.3     | -9.0   | —        | —        | —        |
| Glu5  | -79.7     | 142.4  | 72.6     | -178.8   | 87.4     |
| Thr6  | -79.0     | 124.8  | -179.0   | -70.3    | —        |
| Gly7  | 114.9     | -22.8  | —        | —        | —        |
| Thr8  | -134.4    | 128.2  | -48.2    | 69.6     | —        |
| Trp9  | -133.5    | 127.7  | -20.3    | 103.6    | —        |
| Gly10 | -172.2    | 173.5  | —        | —        | —        |

**Table S4.** Results of single-point *ab initio* calculation for representative structure A of chignolin in water.

Calculation level: HF/IEFPCM/6-31+G(d,p)

SCF energy: -3800.42798 a.u.

| No. | Atom | X      | Y      | Z      | No. | Atom | X      | Y      | Z      | No. | Atom | X      | Y      | Z      |
|-----|------|--------|--------|--------|-----|------|--------|--------|--------|-----|------|--------|--------|--------|
| 1   | N    | 6.313  | 4.572  | -0.307 | 47  | C    | -3.337 | 6.038  | 5.123  | 93  | N    | -1.986 | 1.010  | -0.479 |
| 2   | H    | 5.549  | 4.188  | -0.847 | 48  | H    | -3.676 | 6.983  | 4.711  | 94  | H    | -1.761 | 1.959  | -0.239 |
| 3   | H    | 7.164  | 4.200  | -0.658 | 49  | H    | -3.359 | 6.116  | 6.203  | 95  | C    | -1.057 | -0.037 | -0.100 |
| 4   | H    | 6.333  | 5.554  | -0.461 | 50  | C    | -4.192 | 4.883  | 4.598  | 96  | H    | -1.565 | -0.970 | -0.284 |
| 5   | C    | 6.045  | 4.204  | 1.120  | 51  | H    | -5.248 | 5.115  | 4.552  | 97  | C    | 0.299  | -0.039 | -0.930 |
| 6   | H    | 6.036  | 5.100  | 1.721  | 52  | H    | -4.069 | 4.010  | 5.231  | 98  | H    | 0.737  | -1.019 | -0.834 |
| 7   | H    | 6.830  | 3.548  | 1.467  | 53  | C    | -3.597 | 4.572  | 3.208  | 99  | C    | 0.178  | 0.245  | -2.417 |
| 8   | C    | 4.682  | 3.498  | 1.123  | 54  | H    | -3.615 | 3.508  | 2.999  | 100 | H    | 1.162  | 0.197  | -2.877 |
| 9   | O    | 4.131  | 3.338  | 0.074  | 55  | C    | -4.408 | 5.220  | 2.090  | 101 | H    | -0.218 | 1.228  | -2.593 |
| 10  | N    | 4.218  | 3.116  | 2.312  | 56  | O    | -5.397 | 4.651  | 1.680  | 102 | H    | -0.446 | -0.474 | -2.919 |
| 11  | H    | 4.759  | 3.400  | 3.111  | 57  | N    | -4.036 | 6.412  | 1.635  | 103 | O    | 1.178  | 0.904  | -0.379 |
| 12  | C    | 2.901  | 2.543  | 2.531  | 58  | H    | -3.162 | 6.747  | 1.982  | 104 | H    | 2.036  | 0.781  | -0.749 |
| 13  | H    | 2.504  | 2.344  | 1.548  | 59  | C    | -4.747 | 7.110  | 0.573  | 105 | C    | -0.847 | 0.086  | 1.413  |
| 14  | C    | 2.884  | 1.182  | 3.338  | 60  | H    | -5.786 | 6.841  | 0.676  | 106 | O    | -0.731 | 1.168  | 1.949  |
| 15  | H    | 1.866  | 0.942  | 3.594  | 61  | C    | -4.613 | 8.693  | 0.683  | 107 | N    | -0.797 | -1.055 | 2.091  |
| 16  | H    | 3.421  | 1.318  | 4.262  | 62  | H    | -5.460 | 9.074  | 1.242  | 108 | H    | -0.921 | -1.904 | 1.568  |
| 17  | C    | 3.467  | -0.038 | 2.672  | 63  | H    | -4.656 | 9.137  | -0.300 | 109 | C    | -0.586 | -1.148 | 3.523  |
| 18  | C    | 2.712  | -0.845 | 1.858  | 64  | C    | -3.359 | 9.272  | 1.341  | 110 | H    | -0.120 | -0.223 | 3.822  |
| 19  | H    | 1.688  | -0.604 | 1.691  | 65  | H    | -2.477 | 8.956  | 0.795  | 111 | C    | -1.911 | -1.332 | 4.388  |
| 20  | C    | 3.241  | -1.957 | 1.244  | 66  | H    | -3.252 | 8.933  | 2.360  | 112 | H    | -1.651 | -1.291 | 5.431  |
| 21  | H    | 2.635  | -2.558 | 0.606  | 67  | C    | -3.382 | 10.825 | 1.332  | 113 | H    | -2.322 | -2.311 | 4.202  |
| 22  | C    | 4.550  | -2.300 | 1.454  | 68  | O    | -3.182 | 11.370 | 2.402  | 114 | C    | -3.025 | -0.350 | 4.190  |
| 23  | O    | 5.126  | -3.366 | 0.863  | 69  | O    | -3.597 | 11.331 | 0.239  | 115 | C    | -3.285 | 0.727  | 4.930  |
| 24  | H    | 4.489  | -4.010 | 0.645  | 70  | C    | -4.323 | 6.559  | -0.796 | 116 | H    | -2.760 | 1.093  | 5.771  |
| 25  | C    | 5.324  | -1.516 | 2.266  | 71  | O    | -5.093 | 6.630  | -1.732 | 117 | N    | -4.391 | 1.383  | 4.472  |
| 26  | H    | 6.337  | -1.790 | 2.426  | 72  | N    | -3.125 | 5.995  | -0.915 | 118 | H    | -4.791 | 2.183  | 4.879  |
| 27  | C    | 4.781  | -0.403 | 2.862  | 73  | H    | -2.604 | 5.919  | -0.067 | 119 | C    | -4.887 | 0.712  | 3.413  |
| 28  | H    | 5.396  | 0.190  | 3.498  | 74  | C    | -2.660 | 5.375  | -2.148 | 120 | C    | -5.996 | 0.974  | 2.630  |
| 29  | C    | 2.053  | 3.669  | 3.139  | 75  | H    | -3.135 | 5.911  | -2.953 | 121 | H    | -6.620 | 1.820  | 2.810  |
| 30  | O    | 2.366  | 4.208  | 4.181  | 76  | C    | -1.080 | 5.473  | -2.325 | 122 | C    | -6.266 | 0.110  | 1.621  |
| 31  | N    | 1.017  | 4.070  | 2.417  | 77  | H    | -0.635 | 4.921  | -1.509 | 123 | H    | -7.115 | 0.283  | 0.999  |
| 32  | H    | 0.841  | 3.580  | 1.557  | 78  | C    | -0.506 | 4.904  | -3.607 | 124 | C    | -5.455 | -0.997 | 1.386  |
| 33  | C    | 0.143  | 5.170  | 2.775  | 79  | H    | 0.571  | 5.025  | -3.587 | 125 | H    | -5.696 | -1.655 | 0.590  |
| 34  | H    | 0.217  | 5.283  | 3.846  | 80  | H    | -0.882 | 5.430  | -4.468 | 126 | C    | -4.362 | -1.247 | 2.163  |
| 35  | C    | 0.514  | 6.566  | 2.104  | 81  | H    | -0.727 | 3.856  | -3.715 | 127 | H    | -3.750 | -2.101 | 1.976  |
| 36  | H    | -0.389 | 7.070  | 1.802  | 82  | O    | -0.585 | 6.785  | -2.279 | 128 | C    | -4.061 | -0.384 | 3.197  |
| 37  | H    | 1.113  | 6.389  | 1.225  | 83  | H    | -0.889 | 7.222  | -1.513 | 129 | C    | 0.430  | -2.274 | 3.727  |
| 38  | C    | 1.308  | 7.541  | 3.004  | 84  | C    | -3.194 | 3.939  | -2.250 | 130 | O    | 0.350  | -3.315 | 3.107  |
| 39  | O    | 2.495  | 7.277  | 3.133  | 85  | O    | -3.346 | 3.436  | -3.344 | 131 | N    | 1.395  | -2.037 | 4.603  |
| 40  | O    | 0.663  | 8.451  | 3.503  | 86  | N    | -3.496 | 3.288  | -1.131 | 132 | H    | 1.517  | -1.123 | 4.986  |
| 41  | C    | -1.278 | 4.704  | 2.449  | 87  | H    | -3.404 | 3.791  | -0.277 | 133 | C    | 2.567  | -2.862 | 4.819  |
| 42  | O    | -1.517 | 4.065  | 1.447  | 88  | C    | -4.132 | 1.994  | -1.107 | 134 | H    | 3.007  | -3.153 | 3.871  |
| 43  | N    | -2.223 | 5.041  | 3.322  | 89  | H    | -4.692 | 1.846  | -2.018 | 135 | H    | 2.308  | -3.774 | 5.346  |
| 44  | C    | -1.942 | 5.707  | 4.600  | 90  | H    | -4.827 | 1.957  | -0.278 | 136 | C    | 3.614  | -2.066 | 5.651  |
| 45  | H    | -1.323 | 6.582  | 4.446  | 91  | C    | -3.207 | 0.798  | -0.949 | 137 | O    | 3.370  | -0.869 | 5.800  |
| 46  | H    | -1.424 | 5.028  | 5.270  | 92  | O    | -3.631 | -0.310 | -1.199 | 138 | O    | 4.548  | -2.733 | 6.061  |

**Table S5.** Results of single-point *ab initio* calculation for representative structure A' of chignolin in water.

Calculation level: HF/IEFPCM/6-31+G(d,p)

SCF energy: -3800.43678 a.u.

| No. | Atom | X      | Y      | Z      | No. | Atom | X       | Y      | Z      | No. | Atom | X      | Y      | Z      |
|-----|------|--------|--------|--------|-----|------|---------|--------|--------|-----|------|--------|--------|--------|
| 1   | N    | -1.069 | -8.525 | -5.290 | 47  | C    | -8.089  | 0.298  | -4.319 | 93  | N    | -3.909 | -3.593 | 2.157  |
| 2   | H    | -1.095 | -8.594 | -4.295 | 48  | H    | -9.114  | 0.059  | -4.057 | 94  | H    | -4.469 | -3.701 | 1.327  |
| 3   | H    | -0.353 | -9.105 | -5.635 | 49  | H    | -8.092  | 0.754  | -5.301 | 95  | C    | -2.794 | -4.495 | 2.366  |
| 4   | H    | -1.922 | -8.893 | -5.617 | 50  | C    | -7.457  | 1.200  | -3.255 | 96  | H    | -2.224 | -4.079 | 3.183  |
| 5   | C    | -0.892 | -7.081 | -5.630 | 51  | H    | -8.126  | 1.966  | -2.887 | 97  | C    | -3.190 | -5.980 | 2.762  |
| 6   | H    | -1.452 | -6.855 | -6.525 | 52  | H    | -6.576  | 1.688  | -3.654 | 98  | H    | -3.906 | -6.323 | 2.029  |
| 7   | H    | 0.159  | -6.897 | -5.807 | 53  | C    | -7.015  | 0.221  | -2.145 | 99  | C    | -2.071 | -6.997 | 2.789  |
| 8   | C    | -1.377 | -6.301 | -4.400 | 54  | H    | -6.090  | 0.538  | -1.682 | 100 | H    | -2.483 | -7.963 | 3.053  |
| 9   | O    | -1.579 | -6.915 | -3.398 | 55  | C    | -8.040  | 0.153  | -1.016 | 101 | H    | -1.332 | -6.739 | 3.525  |
| 10  | N    | -1.526 | -4.986 | -4.550 | 56  | O    | -7.992  | 0.980  | -0.129 | 102 | H    | -1.589 | -7.086 | 1.832  |
| 11  | H    | -1.432 | -4.639 | -5.490 | 57  | N    | -8.996  | -0.772 | -1.076 | 103 | O    | -3.783 | -6.090 | 4.025  |
| 12  | C    | -2.121 | -4.119 | -3.554 | 58  | H    | -8.909  | -1.433 | -1.824 | 104 | H    | -4.525 | -5.528 | 4.085  |
| 13  | H    | -2.215 | -4.707 | -2.655 | 59  | C    | -10.057 | -0.890 | -0.084 | 105 | C    | -1.930 | -4.392 | 1.104  |
| 14  | C    | -1.235 | -2.836 | -3.220 | 60  | H    | -10.115 | 0.069  | 0.403  | 106 | O    | -2.407 | -4.528 | -0.002 |
| 15  | H    | -0.619 | -2.611 | -4.076 | 61  | C    | -11.474 | -1.230 | -0.724 | 107 | N    | -0.651 | -4.097 | 1.295  |
| 16  | H    | -0.571 | -3.082 | -2.403 | 62  | H    | -11.592 | -0.681 | -1.643 | 108 | H    | -0.334 | -4.149 | 2.246  |
| 17  | C    | -1.933 | -1.545 | -2.847 | 63  | H    | -12.253 | -0.903 | -0.054 | 109 | C    | 0.342  | -4.082 | 0.239  |
| 18  | C    | -2.623 | -1.394 | -1.660 | 64  | C    | -11.795 | -2.682 | -1.064 | 110 | H    | -0.204 | -4.070 | -0.692 |
| 19  | H    | -2.649 | -2.204 | -0.968 | 65  | H    | -11.784 | -3.290 | -0.179 | 111 | C    | 1.288  | -2.803 | 0.282  |
| 20  | C    | -3.262 | -0.224 | -1.329 | 66  | H    | -11.068 | -3.071 | -1.756 | 112 | H    | 2.028  | -2.892 | -0.500 |
| 21  | H    | -3.787 | -0.120 | -0.410 | 67  | C    | -13.195 | -2.757 | -1.723 | 113 | H    | 1.818  | -2.790 | 1.225  |
| 22  | C    | -3.225 | 0.846  | -2.191 | 68  | O    | -13.226 | -2.480 | -2.902 | 114 | C    | 0.667  | -1.441 | 0.112  |
| 23  | O    | -3.858 | 1.978  | -1.820 | 69  | O    | -14.113 | -3.042 | -0.985 | 115 | C    | 0.840  | -0.627 | -0.935 |
| 24  | H    | -3.971 | 2.548  | -2.554 | 70  | C    | -9.637  | -1.877 | 1.013  | 116 | H    | 1.368  | -0.811 | -1.840 |
| 25  | C    | -2.551 | 0.725  | -3.374 | 71  | O    | -10.054 | -1.722 | 2.146  | 117 | N    | 0.222  | 0.579  | -0.731 |
| 26  | H    | -2.510 | 1.550  | -4.048 | 72  | N    | -8.830  | -2.883 | 0.690  | 118 | H    | 0.216  | 1.335  | -1.363 |
| 27  | C    | -1.920 | -0.465 | -3.693 | 73  | H    | -8.476  | -2.864 | -0.243 | 119 | C    | -0.348 | 0.574  | 0.500  |
| 28  | H    | -1.402 | -0.538 | -4.621 | 74  | C    | -8.322  | -3.834 | 1.671  | 120 | C    | -1.058 | 1.567  | 1.162  |
| 29  | C    | -3.537 | -3.774 | -4.032 | 75  | H    | -9.101  | -3.957 | 2.407  | 121 | H    | -1.250 | 2.516  | 0.703  |
| 30  | O    | -3.795 | -3.643 | -5.209 | 76  | C    | -7.992  | -5.252 | 1.029  | 122 | C    | -1.498 | 1.295  | 2.422  |
| 31  | N    | -4.445 | -3.607 | -3.084 | 77  | H    | -7.145  | -5.115 | 0.373  | 123 | H    | -2.048 | 2.041  | 2.961  |
| 32  | H    | -4.136 | -3.720 | -2.135 | 78  | C    | -7.625  | -6.362 | 1.989  | 124 | C    | -1.237 | 0.062  | 3.025  |
| 33  | C    | -5.817 | -3.197 | -3.319 | 79  | H    | -7.414  | -7.259 | 1.419  | 125 | H    | -1.588 | -0.116 | 4.017  |
| 34  | H    | -5.852 | -2.822 | -4.330 | 80  | H    | -8.438  | -6.581 | 2.658  | 126 | C    | -0.542 | -0.914 | 2.362  |
| 35  | C    | -6.887 | -4.368 | -3.186 | 81  | H    | -6.755  | -6.118 | 2.571  | 127 | H    | -0.345 | -1.854 | 2.838  |
| 36  | H    | -7.879 | -3.943 | -3.177 | 82  | O    | -9.042  | -5.788 | 0.271  | 128 | C    | -0.089 | -0.671 | 1.072  |
| 37  | H    | -6.731 | -4.891 | -2.257 | 83  | H    | -9.324  | -5.174 | -0.371 | 129 | C    | 1.109  | -5.410 | 0.306  |
| 38  | C    | -6.847 | -5.418 | -4.323 | 84  | C    | -7.140  | -3.223 | 2.440  | 130 | O    | 1.316  | -5.972 | 1.361  |
| 39  | O    | -6.196 | -6.421 | -4.093 | 85  | O    | -6.875  | -3.636 | 3.549  | 131 | N    | 1.548  | -5.884 | -0.846 |
| 40  | O    | -7.462 | -5.117 | -5.335 | 86  | N    | -6.458  | -2.230 | 1.881  | 132 | H    | 1.330  | -5.431 | -1.709 |
| 41  | C    | -6.083 | -2.022 | -2.374 | 87  | H    | -6.707  | -1.968 | 0.955  | 133 | C    | 2.244  | -7.136 | -1.056 |
| 42  | O    | -5.644 | -2.008 | -1.244 | 88  | C    | -5.300  | -1.609 | 2.482  | 134 | H    | 1.750  | -7.938 | -0.523 |
| 43  | N    | -6.822 | -1.032 | -2.864 | 89  | H    | -5.583  | -1.031 | 3.351  | 135 | H    | 3.263  | -7.080 | -0.682 |
| 44  | C    | -7.225 | -0.959 | -4.275 | 90  | H    | -4.868  | -0.934 | 1.755  | 136 | C    | 2.276  | -7.462 | -2.576 |
| 45  | H    | -7.757 | -1.854 | -4.563 | 91  | C    | -4.199  | -2.557 | 2.942  | 137 | O    | 1.914  | -6.550 | -3.318 |
| 46  | H    | -6.351 | -0.855 | -4.906 | 92  | O    | -3.574  | -2.307 | 3.948  | 138 | O    | 2.661  | -8.587 | -2.847 |

**Table S6.** Results of single-point *ab initio* calculation for representative structure B of chignolin in water.

Calculation level: HF/IEFPCM/6-31+G(d,p)

SCF energy: -3800.39878 a.u.

| No. | Atom | X      | Y      | Z      | No. | Atom | X      | Y      | Z      | No. | Atom | X      | Y      | Z      |
|-----|------|--------|--------|--------|-----|------|--------|--------|--------|-----|------|--------|--------|--------|
| 1   | N    | 5.395  | 0.210  | 6.233  | 47  | C    | 0.616  | 8.594  | -0.375 | 93  | N    | -3.422 | 0.278  | -1.006 |
| 2   | H    | 4.625  | -0.308 | 5.812  | 48  | H    | 0.298  | 8.220  | -1.345 | 94  | H    | -3.530 | 1.267  | -0.846 |
| 3   | H    | 5.226  | 0.220  | 7.228  | 49  | H    | 1.355  | 9.368  | -0.539 | 95  | C    | -2.090 | -0.241 | -1.263 |
| 4   | H    | 6.264  | -0.274 | 6.071  | 50  | C    | -0.587 | 9.088  | 0.433  | 96  | H    | -2.144 | -1.300 | -1.060 |
| 5   | C    | 5.370  | 1.587  | 5.649  | 51  | H    | -1.305 | 9.644  | -0.156 | 97  | C    | -1.550 | -0.065 | -2.743 |
| 6   | H    | 5.906  | 1.563  | 4.709  | 52  | H    | -0.254 | 9.729  | 1.243  | 98  | H    | -1.616 | 0.981  | -3.002 |
| 7   | H    | 5.860  | 2.267  | 6.329  | 53  | C    | -1.194 | 7.802  | 1.037  | 99  | C    | -0.099 | -0.485 | -2.966 |
| 8   | C    | 3.890  | 1.900  | 5.404  | 54  | H    | -1.569 | 7.981  | 2.037  | 100 | H    | 0.158  | -0.302 | -4.002 |
| 9   | O    | 3.142  | 0.973  | 5.305  | 55  | C    | -2.406 | 7.323  | 0.242  | 101 | H    | 0.042  | -1.542 | -2.772 |
| 10  | N    | 3.551  | 3.180  | 5.340  | 56  | O    | -3.471 | 7.877  | 0.430  | 102 | H    | 0.594  | 0.065  | -2.343 |
| 11  | H    | 4.307  | 3.839  | 5.361  | 57  | N    | -2.263 | 6.340  | -0.647 | 103 | O    | -2.329 | -0.726 | -3.710 |
| 12  | C    | 2.223  | 3.663  | 5.014  | 58  | H    | -1.404 | 5.830  | -0.573 | 104 | H    | -2.432 | -1.627 | -3.475 |
| 13  | H    | 1.607  | 2.788  | 4.883  | 59  | C    | -3.397 | 5.709  | -1.302 | 105 | C    | -1.205 | 0.386  | -0.182 |
| 14  | C    | 1.567  | 4.565  | 6.149  | 60  | H    | -4.114 | 6.496  | -1.483 | 106 | O    | -1.123 | 1.592  | -0.057 |
| 15  | H    | 2.320  | 5.236  | 6.541  | 61  | C    | -3.046 | 5.041  | -2.698 | 107 | N    | -0.611 | -0.457 | 0.645  |
| 16  | H    | 1.247  | 3.927  | 6.962  | 62  | H    | -2.042 | 5.301  | -2.983 | 108 | H    | -0.708 | -1.435 | 0.440  |
| 17  | C    | 0.372  | 5.419  | 5.766  | 63  | H    | -3.695 | 5.445  | -3.451 | 109 | C    | 0.264  | -0.068 | 1.734  |
| 18  | C    | -0.917 | 4.980  | 5.961  | 64  | C    | -3.143 | 3.521  | -2.819 | 110 | H    | 0.505  | 0.974  | 1.578  |
| 19  | H    | -1.082 | 4.014  | 6.386  | 65  | H    | -4.018 | 3.139  | -2.329 | 111 | C    | -0.397 | -0.218 | 3.176  |
| 20  | C    | -2.011 | 5.762  | 5.632  | 66  | H    | -2.301 | 3.049  | -2.342 | 112 | H    | 0.374  | -0.106 | 3.921  |
| 21  | H    | -3.001 | 5.402  | 5.810  | 67  | C    | -3.195 | 3.022  | -4.286 | 113 | H    | -0.795 | -1.215 | 3.281  |
| 22  | C    | -1.826 | 7.010  | 5.088  | 68  | O    | -2.614 | 3.719  | -5.107 | 114 | C    | -1.501 | 0.727  | 3.550  |
| 23  | O    | -2.858 | 7.829  | 4.773  | 69  | O    | -3.794 | 1.968  | -4.454 | 115 | C    | -1.381 | 1.949  | 4.072  |
| 24  | H    | -3.630 | 7.335  | 4.596  | 70  | C    | -4.037 | 4.740  | -0.296 | 116 | H    | -0.504 | 2.474  | 4.339  |
| 25  | C    | -0.547 | 7.478  | 4.897  | 71  | O    | -3.364 | 3.977  | 0.367  | 117 | N    | -2.606 | 2.525  | 4.257  |
| 26  | H    | -0.415 | 8.455  | 4.488  | 72  | N    | -5.362 | 4.803  | -0.189 | 118 | H    | -2.770 | 3.403  | 4.669  |
| 27  | C    | 0.531  | 6.689  | 5.240  | 73  | H    | -5.814 | 5.339  | -0.907 | 119 | C    | -3.559 | 1.658  | 3.857  |
| 28  | H    | 1.517  | 7.073  | 5.093  | 74  | C    | -6.154 | 3.824  | 0.541  | 120 | C    | -4.937 | 1.782  | 3.861  |
| 29  | C    | 2.326  | 4.367  | 3.658  | 75  | H    | -5.526 | 3.492  | 1.355  | 121 | H    | -5.418 | 2.666  | 4.217  |
| 30  | O    | 3.279  | 5.057  | 3.372  | 76  | C    | -7.488 | 4.390  | 1.175  | 122 | C    | -5.656 | 0.734  | 3.390  |
| 31  | N    | 1.309  | 4.181  | 2.823  | 77  | H    | -8.060 | 4.836  | 0.373  | 123 | H    | -6.721 | 0.798  | 3.378  |
| 32  | H    | 0.537  | 3.639  | 3.171  | 78  | C    | -8.392 | 3.384  | 1.858  | 124 | C    | -5.030 | -0.420 | 2.924  |
| 33  | C    | 1.165  | 4.841  | 1.542  | 79  | H    | -9.275 | 3.897  | 2.217  | 125 | H    | -5.624 | -1.220 | 2.562  |
| 34  | H    | 1.996  | 5.523  | 1.457  | 80  | H    | -7.904 | 2.932  | 2.703  | 126 | C    | -3.671 | -0.535 | 2.925  |
| 35  | C    | 1.204  | 3.860  | 0.290  | 81  | H    | -8.706 | 2.603  | 1.182  | 127 | H    | -3.202 | -1.424 | 2.566  |
| 36  | H    | 0.746  | 4.347  | -0.558 | 82  | O    | -7.264 | 5.377  | 2.151  | 128 | C    | -2.910 | 0.516  | 3.398  |
| 37  | H    | 0.639  | 2.971  | 0.515  | 83  | H    | -6.926 | 6.151  | 1.756  | 129 | C    | 1.555  | -0.875 | 1.569  |
| 38  | C    | 2.616  | 3.411  | -0.156 | 84  | C    | -6.333 | 2.619  | -0.397 | 130 | O    | 1.546  | -1.999 | 1.109  |
| 39  | O    | 2.952  | 2.292  | 0.193  | 85  | O    | -6.908 | 2.721  | -1.460 | 131 | N    | 2.661  | -0.290 | 1.985  |
| 40  | O    | 3.242  | 4.235  | -0.805 | 86  | N    | -5.741 | 1.488  | -0.016 | 132 | H    | 2.659  | 0.666  | 2.277  |
| 41  | C    | -0.116 | 5.677  | 1.621  | 87  | H    | -5.391 | 1.461  | 0.916  | 133 | C    | 4.008  | -0.806 | 1.858  |
| 42  | O    | -1.121 | 5.247  | 2.147  | 88  | C    | -5.850 | 0.243  | -0.737 | 134 | H    | 4.189  | -1.155 | 0.847  |
| 43  | N    | -0.057 | 6.890  | 1.081  | 89  | H    | -6.294 | 0.436  | -1.703 | 135 | H    | 4.162  | -1.652 | 2.520  |
| 44  | C    | 1.159  | 7.451  | 0.476  | 90  | H    | -6.484 | -0.456 | -0.210 | 136 | C    | 5.031  | 0.313  | 2.210  |
| 45  | H    | 1.681  | 6.698  | -0.097 | 91  | C    | -4.525 | -0.462 | -0.984 | 137 | O    | 4.541  | 1.411  | 2.484  |
| 46  | H    | 1.820  | 7.820  | 1.253  | 92  | O    | -4.519 | -1.655 | -1.192 | 138 | O    | 6.199  | -0.042 | 2.171  |



**Table S7.** Results of single-point *ab initio* calculation for representative structure C of chignolin in water.

Calculation level: HF/IEFPCM/6-31+G(d,p)

SCF energy: -3800.43002 a.u.

| No. | Atom | X      | Y     | Z      | No. | Atom | X      | Y      | Z      | No. | Atom | X      | Y      | Z      |
|-----|------|--------|-------|--------|-----|------|--------|--------|--------|-----|------|--------|--------|--------|
| 1   | N    | 6.834  | 1.746 | 4.668  | 47  | C    | -0.243 | 9.375  | -0.293 | 93  | N    | -2.117 | 0.629  | -1.347 |
| 2   | H    | 5.994  | 1.198 | 4.598  | 48  | H    | -0.671 | 8.933  | -1.187 | 94  | H    | -2.404 | 1.365  | -0.730 |
| 3   | H    | 7.394  | 1.368 | 5.389  | 49  | H    | 0.323  | 10.250 | -0.589 | 95  | C    | -0.831 | 0.681  | -2.028 |
| 4   | H    | 7.334  | 1.637 | 3.822  | 50  | C    | -1.339 | 9.702  | 0.725  | 96  | H    | -0.851 | -0.109 | -2.759 |
| 5   | C    | 6.401  | 3.156 | 4.922  | 51  | H    | -2.233 | 10.114 | 0.277  | 97  | C    | -0.577 | 2.067  | -2.769 |
| 6   | H    | 6.856  | 3.805 | 4.189  | 52  | H    | -0.972 | 10.417 | 1.452  | 98  | H    | 0.487  | 2.135  | -2.972 |
| 7   | H    | 6.727  | 3.450 | 5.909  | 53  | C    | -1.606 | 8.361  | 1.444  | 99  | C    | -1.295 | 2.261  | -4.097 |
| 8   | C    | 4.868  | 3.152 | 4.818  | 54  | H    | -1.797 | 8.512  | 2.499  | 100 | H    | -1.007 | 3.219  | -4.511 |
| 9   | O    | 4.325  | 2.104 | 4.627  | 55  | C    | -2.855 | 7.667  | 0.906  | 101 | H    | -2.368 | 2.269  | -3.959 |
| 10  | N    | 4.266  | 4.324 | 4.952  | 56  | O    | -3.936 | 7.974  | 1.368  | 102 | H    | -1.044 | 1.490  | -4.812 |
| 11  | H    | 4.868  | 5.126 | 5.011  | 57  | N    | -2.730 | 6.793  | -0.091 | 103 | O    | -0.948 | 3.175  | -1.978 |
| 12  | C    | 2.847  | 4.544 | 4.750  | 58  | H    | -1.794 | 6.478  | -0.264 | 104 | H    | -0.208 | 3.499  | -1.502 |
| 13  | H    | 2.413  | 3.573 | 4.568  | 59  | C    | -3.831 | 5.983  | -0.574 | 105 | C    | 0.293  | 0.303  | -1.053 |
| 14  | C    | 2.113  | 5.192 | 6.004  | 60  | H    | -4.734 | 6.537  | -0.360 | 106 | O    | 1.315  | -0.192 | -1.487 |
| 15  | H    | 2.678  | 6.047 | 6.335  | 61  | C    | -3.776 | 5.712  | -2.141 | 107 | N    | 0.118  | 0.528  | 0.250  |
| 16  | H    | 2.110  | 4.480 | 6.811  | 62  | H    | -3.714 | 4.652  | -2.329 | 108 | H    | -0.784 | 0.880  | 0.512  |
| 17  | C    | 0.688  | 5.658 | 5.824  | 63  | H    | -2.871 | 6.162  | -2.538 | 109 | C    | 1.104  | 0.171  | 1.261  |
| 18  | C    | 0.390  | 6.970 | 5.558  | 64  | C    | -4.932 | 6.220  | -3.009 | 110 | H    | 2.047  | 0.097  | 0.746  |
| 19  | H    | 1.186  | 7.670 | 5.464  | 65  | H    | -5.024 | 7.294  | -2.961 | 111 | C    | 1.224  | 1.269  | 2.408  |
| 20  | C    | -0.905 | 7.409 | 5.419  | 66  | H    | -5.866 | 5.796  | -2.665 | 112 | H    | 1.553  | 2.201  | 1.963  |
| 21  | H    | -1.123 | 8.428 | 5.220  | 67  | C    | -4.757 | 5.800  | -4.489 | 113 | H    | 1.988  | 0.961  | 3.112  |
| 22  | C    | -1.943 | 6.529 | 5.541  | 68  | O    | -4.540 | 4.612  | -4.664 | 114 | C    | -0.011 | 1.592  | 3.211  |
| 23  | O    | -3.203 | 6.989 | 5.381  | 69  | O    | -4.870 | 6.687  | -5.314 | 115 | C    | -0.831 | 2.638  | 3.034  |
| 24  | H    | -3.794 | 6.550 | 5.951  | 70  | C    | -3.874 | 4.699  | 0.267  | 116 | H    | -0.780 | 3.408  | 2.300  |
| 25  | C    | -1.676 | 5.218 | 5.820  | 71  | O    | -2.861 | 4.163  | 0.661  | 117 | N    | -1.838 | 2.636  | 3.968  |
| 26  | H    | -2.479 | 4.529 | 5.919  | 72  | N    | -5.083 | 4.208  | 0.522  | 118 | H    | -2.543 | 3.323  | 4.053  |
| 27  | C    | -0.373 | 4.798 | 5.966  | 73  | H    | -5.824 | 4.626  | -0.005 | 119 | C    | -1.666 | 1.573  | 4.796  |
| 28  | H    | -0.185 | 3.777 | 6.197  | 74  | C    | -5.297 | 2.896  | 1.107  | 120 | C    | -2.413 | 1.161  | 5.895  |
| 29  | C    | 2.698  | 5.366 | 3.463  | 75  | H    | -4.453 | 2.717  | 1.757  | 121 | H    | -3.284 | 1.700  | 6.216  |
| 30  | O    | 3.490  | 6.234 | 3.169  | 76  | C    | -6.616 | 2.783  | 1.979  | 122 | C    | -1.995 | 0.042  | 6.558  |
| 31  | N    | 1.647  | 5.081 | 2.708  | 77  | H    | -7.419 | 3.233  | 1.407  | 123 | H    | -2.547 | -0.301 | 7.410  |
| 32  | H    | 1.005  | 4.404 | 3.078  | 78  | C    | -7.066 | 1.380  | 2.343  | 124 | C    | -0.857 | -0.659 | 6.143  |
| 33  | C    | 1.249  | 5.834 | 1.536  | 79  | H    | -7.988 | 1.448  | 2.910  | 125 | H    | -0.555 | -1.529 | 6.687  |
| 34  | H    | 1.966  | 6.635 | 1.427  | 80  | H    | -6.334 | 0.886  | 2.961  | 126 | C    | -0.127 | -0.247 | 5.057  |
| 35  | C    | 1.254  | 4.972 | 0.195  | 81  | H    | -7.250 | 0.775  | 1.469  | 127 | H    | 0.745  | -0.792 | 4.750  |
| 36  | H    | 0.673  | 5.485 | -0.560 | 82  | O    | -6.527 | 3.456  | 3.211  | 128 | C    | -0.530 | 0.887  | 4.359  |
| 37  | H    | 0.794  | 4.010 | 0.387  | 83  | H    | -6.512 | 4.380  | 3.074  | 129 | C    | 0.826  | -1.241 | 1.796  |
| 38  | C    | 2.664  | 4.707 | -0.395 | 84  | C    | -5.215 | 1.866  | -0.031 | 130 | O    | 1.729  | -1.873 | 2.306  |
| 39  | O    | 3.072  | 5.555 | -1.188 | 85  | O    | -5.805 | 2.029  | -1.078 | 131 | N    | -0.385 | -1.750 | 1.658  |
| 40  | O    | 3.228  | 3.695 | 0.020  | 86  | N    | -4.441 | 0.802  | 0.198  | 132 | H    | -1.136 | -1.153 | 1.384  |
| 41  | C    | -0.111 | 6.467 | 1.847  | 87  | H    | -4.039 | 0.720  | 1.105  | 133 | C    | -0.886 | -2.951 | 2.303  |
| 42  | O    | -0.918 | 5.917 | 2.571  | 88  | C    | -4.298 | -0.302 | -0.719 | 134 | H    | -0.276 | -3.187 | 3.164  |
| 43  | N    | -0.362 | 7.626 | 1.255  | 89  | H    | -5.086 | -0.258 | -1.457 | 135 | H    | -0.840 | -3.799 | 1.625  |
| 44  | C    | 0.620  | 8.351 | 0.438  | 90  | H    | -4.397 | -1.236 | -0.181 | 136 | C    | -2.364 | -2.734 | 2.733  |
| 45  | H    | 1.139  | 7.673 | -0.225 | 91  | C    | -2.982 | -0.374 | -1.478 | 137 | O    | -2.776 | -3.511 | 3.576  |
| 46  | H    | 1.349  | 8.838 | 1.077  | 92  | O    | -2.767 | -1.340 | -2.179 | 138 | O    | -2.951 | -1.835 | 2.131  |
